# Supplementary material for: Desiccation as a Post-maturation Treatment Helps Complete Maturation of Norway Spruce Somatic Embryos: Carbohydrates, Phytohormones and Proteomic Status
Source: Front Plant Sci. 2022 Feb 14;13:823617. doi: 10.3389/fpls.2022.823617 (PMC8882965; doi:10.3389/fpls.2022.823617)
Supplement: Supplementary file 3 [file Table_3.XLSX]

## Sheet: List1
Supplementary Table 2: The content of phytohormones (pmol/g DW) in somatic embryos after five (M5), seven (M7) and eight (M8) weeks of maturation, two (D2) and three (D3) weeks of desiccation and in dry zygotic embryos (ZEd) of Picea abies.
Three biological replicates were used per sample; data are presented as mean values ± standard deviations (stds). Significant differences at P < 0.05 are indicated by different letters.
	ABA	stds		DPA	stds		PA	stds		ABA-GE	stds		NeoPA	stds		9OH-ABA	stds
M5	496678	38658.8	a	52768.7	4911.36	a	18633.8	3222.53	a	41846.6	14942.6	a	690.2	72.3366	a	19030.5	5340.81	a
M7	277946	25374.3	b	29940.7	4114.2	b	4506.37	699.869	b	42912.8	7876.05	a	134.664	10.3581	b	5228.1	343.767	b
M8	253936	27454.8	b	34558.4	2731.68	b	10728.4	1656.74	c	77878.3	19767.1	b	51.5739	4.44295	c	6604.52	932.114	b
D2	165422	29713.5	b,c	2142.64	209.063	c	310.837	53.2018	d	26757.3	4000.01	a	27.2778	4.18674	d	565.657	197.924	b
D3	134706	10882.8	b,c	1639.41	143.226	c	187.512	19.9755	d	39224.5	9569.53	a	26.2314	6.3632	d	501.78	134.758	b
ZEd	1253.84	69.4003	d	119.45	13.6765	d	74.7796	3.63584	e	79.8811	12.043	c	0.501872	0.00647666	e	9.73374	0.939195	c
	IAA	stds		IAA-Asp	stds		IAA-Glu	stds		Ox-IAA	stds		PAA	stds
M5	922.36	114.096	a	265.03	35.7516	a	41.31	7.43442	a	286.94	45.6265	a	458.74	113.695	a
M7	516	60.3461	b	949.87	123.167	b	73.65	14.8002	a	244.82	50.1746	a	309.64	59.1899	a
M8	432.87	53.1494	b	693.87	157.181	a,b	97.4	13.9079	a	271.52	18.9643	a	484.7	52.5385	a
D2	636.74	115.554	b	421.15	40.7893	a	30.27	4.80811	a	671.32	257.056	b	464.42	162.079	a
D3	734.01	133.949	b	571.71	102.561	a	45.71	20.7389	a	922.47	227.522	c	742.6	165.936	a
ZEd	54.2001	7.54074	c	168.827	45.9504	c	16.2011	3.65268	b	104.835	8.96188	d	47.6439	18.3042	b
	total ck	stds			free ck	stds		ribosides	stds		glucosides	stds		phosphates	stds
M5	844.74	166.113	a		95.5811	39.2045	a	36.0121	2.79538	a	416.58	116.226	a	296.564	44.7501	a
M7	1005.51	82.1198	a		76.1134	7.7496	a	12.0456	8.20552	a	452.945	55.2245	a	464.405	37.1868	b
M8	958.28	51.5348	a		101.892	8.38643	a	20.3637	10.3135	a	603.665	61.1635	a	232.356	33.5726	a
D2	2886.8	217.527	b		94.2309	19.5586	a	68.9001	39.6791	b	2143.6	170.933	b	580.062	91.0644	c
D3	2558.43	163.14	b		112.449	23.7418	a	90.7291	11.2326	a,b	1937.08	183.839	b	418.171	46.8066	b
ZEd	22.1723	1.86166	c		0	0	b	0.837131	0.493567	c	10.6927	1.85044	c	10.6425	2.15967	d
	transZ	stds		transZR	stds		transZROG	stds		transZ9G	stds		transZOG	stds		transZRMP	stds
M5	2.61	0.560369	a	3.79	1.25608	a	9.93	1.98803	a	0	0	a	2.04	2.90996	a	5.2	2.8706	a
M7	2.77	0.786478	a	1.06	0.185982	a	5.97	1.38983	a	0	0	a	3.66	3.68415	a	10.91	4.89666	a
M8	4.32	3.53056	a	0.22	0.410998	a	10.03	3.42458	a	0	0	a	1.92	1.42971	a	2.88	2.91421	a,b
D2	2.92	1.89312	a	2.6	1.22308	a	21.7376	6.56305	a	0	0	a	5.2521	1.29916	a	3.65	0.473931	a
D3	2.55	2.07956	a	1.48	0.368052	a	20.9211	7.51944	a	0	0	a	5.07	1.10574	a	8.51	3.50426	a
ZEd	0	0	b	0	0	b	0	0	b	0.437848	0.0792697	b	2.35701	0.38907	b	0.31648	0.0275067	c
	DHZ	stds		DHZR	stds		DHZROG	stds		DHZ9G	stds		DHZRMP	stds
M5	4.61127	3.26269	a	3.53153	0.726226	a	317.299	71.5933	a	0	0	a	26.1599	7.21317	a
M7	4.98003	0.855054	a	2.27714	0.89074	a	232.792	50.5105	a	0	0	a	19.8763	7.25243	a
M8	5.57127	1.24843	a	4.87249	3.63188	a	358.84	35.7878	a	0	0	a	14.0824	1.55234	a
D2	5.243	1.22139	a	28.9107	19.5125	b	600.162	191.962	a,b	0	0	a	29.469	10.9683	a
D3	5.72219	1.51533	a	18.7674	17.9728	a,b	433.261	38.8497	a	0	0	a	17.0055	10.0828	a
ZEd	0	0	b	0	0	c	0	0	c	0.509728	0.509728	b	0.186586	0.323177	b
	cisZR	stds		cisZOG	stds		cisZROG	stds		cisZ9G	stds		cisZRMP	stds
M5	17.1258	1.08639	a	5.89505	2.4779	a	81.4143	59.5806	a	0	0	a	143.997	27.4367	a
M7	3.26348	1.10303	a	11.6168	3.51516	a	198.903	58.4608	a	0	0	a	291.283	37.7093	b
M8	12.578	8.18021	a	7.48711	2.15126	a	225.387	57.4399	a	0	0	a	145.956	30.3202	a
D2	36.7619	22.197	a,b	31.0235	5.92858	b	1485.43	128.431	b	0	0	a	435.086	78.5188	c
D3	64.4405	12.9549	c	64.2274	8.79648	c	1413.59	189.184	b	0	0	a	303.76	56.5871	b
ZEd	0.837131	0.363066	d	2.35505	0.075672	d	4.68406	0.0677181	c	0.349015	0.089662	b	4.4019	0.617673	d
	iP	stds		iPR	stds		iPRMP	stds
M5	88.36	7.39161	a	11.5629	3.70297	a	121.211	15.3768	a
M7	68.3634	7.47245	a	5.44047	7.04035	a	142.336	20.4975	a
M8	91.998	8.00717	a	2.69418	4.64057	a	69.4326	12.8685	b
D2	86.0712	19.382	a	0.628609	1.40561	a	111.854	11.8812	a
D3	104.175	24.6104	a	6.03793	4.35009	a	88.8914	7.24493	a,b
ZEd	0	0	b	0	0	b	5.73752	0.471797	c
